# Supplementary material for: HOXA1 binds RBCK1/HOIL-1 and TRAF2 and modulates the TNF/NF-κB pathway in a transcription-independent manner
Source: PubMed Central journal article supplement — Nucleic Acids Res. 2016 Jul 5;44(15):7331–49. doi: 10.1093/nar/gkw606 (PMC5009750; doi:10.1093/nar/gkw606), 2016-07-05

## SUPPLEMENTAL DATA

**Supplemental Table 1. KEGG NF- $\kappa$ B pathway genes correlating with HOXA1 expression in breast cancer datasets.** All KEGG NF- $\kappa$ B pathway genes that show significant correlation with HOXA1 mRNA expression in the 12 breast cancer datasets with significant over-representation of the KEGG NF- $\kappa$ B pathway. The first two columns represent the NCBI gene name and ID. Column 3 shows the dataset (details in Table 1). Columns 4 and 5 show the Correlation ( $R$ ) and Significance ( $P$ ) results of a 2log-Pearson correlation test. Column 6 denotes whether high HOXA1 expression correlates with high (positive) or low (negative) expression of the listed gene. Column 7 shows the array probe selected as in Materials and Methods. Genes with a negative correlation are in red type. Genes consistently correlated in  $\geq 50\%$  of datasets are on green or yellow field (positive or negative correlation, respectively).

**Supplemental Figure 1. NF- $\kappa$ B pathway genes with consistent correlation to HOXA1 expression in breast cancer.** Graphical overview of the NF- $\kappa$ B pathway showing pathway genes with a significant correlation to HOXA1 mRNA expression as in Figure 1, but now for a total of 12 breast cancer datasets. The KEGG NF- $\kappa$ B pathway graph is overlaid with boxes representing positively or negatively correlating genes only if a significant, consistent correlation was found in at least 50% of datasets analysed. Other details are as in Figure 1 and Supplemental Table 1. The overview shows a very consistent positive correlation with HOXA1 mRNA expression, especially for genes acting at the cell surface (activating ligands and receptors; the upstream part of the pathway) and for target genes in the nucleus (the downstream part of the pathway), strongly suggesting that the NF- $\kappa$ B pathway is activated by HOXA1 in breast cancer cells.

**Supplemental Table 2. Primers used to generate HOXA1 deletion mutants.**

**Supplemental Figure 2. Impact of HOXA1 on NF- $\kappa$ B reporter.** Western Blot showing IKK $\alpha$ , IKK $\beta$ , p-IKK $\alpha/\beta$  (Ser176/180), p65 and p-p65 (Ser536) proteins from MCF10A cells transfected with a FLAG-HOXA1 expression plasmid or with a negative control, and treated with TNF $\alpha$  (25 ng/ml) for 0, 10, 15, 20, 30 or 45 minutes. Detection of  $\beta$ -actin was used as loading control. Bands corresponding to detected proteins were cropped for the sake of presentation but all samples were processed in parallel, being run together on single protein gels.

**Supplemental Figure 3. Impact of HOXA1 pentapeptide insertions on activation of the NF- $\kappa$ B reporter.** Activity of the HOXA1 pentapeptide insertion mutants on the NF- $\kappa$ B reporter. Random pentapeptide insertion mutants were called from P1 to P18 as described previously [44], each arrow represents an insertion, with P1 and P18 as the most N-terminal and C-terminal insertions, respectively. Results were obtained as described in the legend to Figure 2.

| Gene name | GeneID | Dataset       | R      | P         | Sign     | Probe        |
|-----------|--------|---------------|--------|-----------|----------|--------------|
| ATM       | 472    | Bertucci-266  | 0,136  | 2,694E-02 | Positive | 210858_x_at  |
| ATM       | 472    | Black-107     | 0,250  | 9,385E-03 | Positive | 212672_at    |
| ATM       | 472    | Booser-508    | 0,308  | 1,176E-12 | Positive | 210858_x_at  |
| ATM       | 472    | Bos-204       | 0,242  | 4,891E-04 | Positive | 212672_at    |
| ATM       | 472    | Clynes-121    | 0,310  | 5,416E-04 | Positive | 212672_at    |
| ATM       | 472    | Iglehart-123  | 0,196  | 2,941E-02 | Positive | 210858_x_at  |
| ATM       | 472    | Jonsdottir-94 | 0,238  | 2,076E-02 | Positive | ILMN_1779214 |
| ATM       | 472    | Minn-96       | 0,291  | 4,022E-03 | Positive | 210858_x_at  |
| ATM       | 472    | Smid-210      | 0,241  | 4,216E-04 | Positive | 212672_at    |
| ATM       | 472    | Sotiriou-120  | 0,238  | 8,797E-03 | Positive | 212672_at    |
| BCL10     | 8915   | Bertucci-266  | 0,145  | 1,800E-02 | Positive | 205263_at    |
| BCL10     | 8915   | Bos-204       | 0,207  | 2,950E-03 | Positive | 205263_at    |
| BCL10     | 8915   | Smid-210      | 0,226  | 9,764E-04 | Positive | 205263_at    |
| BCL2      | 596    | Bertucci-266  | -0,247 | 4,781E-05 | Negative | 203685_at    |
| BCL2      | 596    | Booser-508    | -0,186 | 2,397E-05 | Negative | 203685_at    |
| BCL2      | 596    | Chin-124      | -0,323 | 2,531E-04 | Negative | 203685_at    |
| BCL2      | 596    | Minn-96       | -0,262 | 1,000E-02 | Negative | 203685_at    |
| BCL2      | 596    | Smid-210      | -0,172 | 1,256E-02 | Negative | 203685_at    |
| BCL2      | 596    | Sotiriou-198  | -0,195 | 5,877E-03 | Negative | 203685_at    |
| BCL2      | 596    | Wang-286      | -0,279 | 1,677E-06 | Negative | 203685_at    |
| BCL2A1    | 597    | Bertucci-266  | 0,289  | 1,619E-06 | Positive | 205681_at    |
| BCL2A1    | 597    | Booser-508    | 0,145  | 1,025E-03 | Positive | 205681_at    |
| BCL2A1    | 597    | Bos-204       | 0,194  | 5,528E-03 | Positive | 205681_at    |
| BCL2A1    | 597    | Chin-124      | 0,184  | 4,088E-02 | Positive | 205681_at    |
| BCL2A1    | 597    | Clynes-121    | 0,306  | 6,303E-04 | Positive | 205681_at    |
| BCL2A1    | 597    | EXPO-351      | 0,186  | 4,476E-04 | Positive | 205681_at    |
| BCL2A1    | 597    | Iglehart-123  | 0,318  | 3,392E-04 | Positive | 205681_at    |
| BCL2A1    | 597    | Minn-96       | 0,206  | 4,367E-02 | Positive | 205681_at    |
| BCL2A1    | 597    | Smid-210      | 0,192  | 5,302E-03 | Positive | 205681_at    |
| BCL2A1    | 597    | Wang-286      | 0,182  | 1,980E-03 | Positive | 205681_at    |
| BCL2L1    | 598    | Bos-204       | -0,236 | 6,841E-04 | Negative | 212312_at    |
| BCL2L1    | 598    | Clynes-121    | -0,182 | 4,549E-02 | Negative | 212312_at    |
| BCL2L1    | 598    | EXPO-351      | -0,163 | 2,239E-03 | Negative | 212312_at    |
| BCL2L1    | 598    | Minn-96       | -0,385 | 1,065E-04 | Negative | 212312_at    |
| BCL2L1    | 598    | Smid-210      | -0,211 | 2,145E-03 | Negative | 212312_at    |
| BCL2L1    | 598    | Sotiriou-198  | -0,206 | 3,629E-03 | Negative | 212312_at    |
| BCL2L1    | 598    | Wang-286      | -0,150 | 1,124E-02 | Negative | 212312_at    |
| BIRC2     |        | Bertucci-266  | 0,224  | 2,270E-04 | Positive | 202076_at    |
| BIRC2     | 329    | Booser-508    | 0,115  | 9,386E-03 | Positive | 202076_at    |
| BIRC2     | 329    | Bos-204       | 0,255  | 2,286E-04 | Positive | 202076_at    |
| BIRC2     | 329    | Clynes-121    | 0,264  | 3,428E-03 | Positive | 202076_at    |
| BIRC2     | 329    | Jonsdottir-94 | 0,244  | 1,758E-02 | Positive | ILMN_2182704 |
| BIRC2     | 329    | Smid-210      | 0,260  | 1,407E-04 | Positive | 202076_at    |
| BIRC2     | 329    | Sotiriou-198  | 0,258  | 2,471E-04 | Positive | 202076_at    |
| BIRC2     | 329    | Wang-286      | 0,238  | 4,788E-05 | Positive | 202076_at    |
| BIRC3     | 330    | Bertucci-266  | 0,340  | 1,243E-08 | Positive | 210538_s_at  |
| BIRC3     | 330    | Booser-508    | 0,162  | 2,526E-04 | Positive | 210538_s_at  |
| BIRC3     | 330    | Bos-204       | 0,260  | 1,710E-04 | Positive | 210538_s_at  |
| BIRC3     | 330    | Chin-124      | 0,254  | 4,416E-03 | Positive | 210538_s_at  |
| BIRC3     | 330    | Clynes-121    | 0,321  | 3,287E-04 | Positive | 210538_s_at  |
| BIRC3     | 330    | EXPO-351      | 0,166  | 1,786E-03 | Positive | 210538_s_at  |
| BIRC3     | 330    | Iglehart-123  | 0,313  | 4,315E-04 | Positive | 210538_s_at  |
| BIRC3     | 330    | Smid-210      | 0,257  | 1,679E-04 | Positive | 210538_s_at  |
| BIRC3     | 330    | Wang-286      | 0,145  | 1,427E-02 | Positive | 210538_s_at  |
| BLNK      | 29760  | Minn-96       | -0,211 | 3,914E-02 | Negative | 207655_s_at  |
| BLNK      | 29760  | Sotiriou-120  | 0,222  | 1,473E-02 | Positive | 207655_s_at  |
| BTK       | 695    | Bertucci-266  | 0,189  | 1,998E-03 | Positive | 205504_at    |
| BTK       | 695    | Black-107     | 0,270  | 4,840E-03 | Positive | 205504_at    |

| Gene name | GeneID | Dataset       | R     | P         | Sign     | Probe        |
|-----------|--------|---------------|-------|-----------|----------|--------------|
| BTK       | 695    | Booser-508    | 0,291 | 2,118E-11 | Positive | 205504_at    |
| BTK       | 695    | Bos-204       | 0,202 | 3,800E-03 | Positive | 205504_at    |
| BTK       | 695    | Chin-124      | 0,248 | 5,400E-03 | Positive | 205504_at    |
| BTK       | 695    | Clynes-121    | 0,329 | 2,280E-04 | Positive | 205504_at    |
| BTK       | 695    | EXPO-351      | 0,165 | 1,928E-03 | Positive | 205504_at    |
| BTK       | 695    | Iglehart-123  | 0,268 | 2,779E-03 | Positive | 205504_at    |
| BTK       | 695    | Jonsdottir-94 | 0,237 | 2,119E-02 | Positive | ILMN_1662026 |
| BTK       | 695    | Smid-210      | 0,169 | 1,445E-02 | Positive | 205504_at    |
| BTK       | 695    | Sotiriou-120  | 0,281 | 1,890E-03 | Positive | 205504_at    |
| BTK       | 695    | Wang-286      | 0,217 | 2,178E-04 | Positive | 205504_at    |
| CARD11    | 84433  | Bertucci-266  | 0,204 | 8,395E-04 | Positive | 223514_at    |
| CARD11    | 84433  | Bos-204       | 0,140 | 4,540E-02 | Positive | 223514_at    |
| CARD11    | 84433  | Clynes-121    | 0,319 | 3,634E-04 | Positive | 223514_at    |
| CARD11    | 84433  | Jonsdottir-94 | 0,216 | 3,624E-02 | Positive | ILMN_1721978 |
| CARD11    | 84433  | Smid-210      | 0,166 | 1,617E-02 | Positive | 223514_at    |
| CCL13     | 6357   | Bertucci-266  | 0,281 | 3,189E-06 | Positive | 206407_s_at  |
| CCL13     | 6357   | Booser-508    | 0,203 | 3,874E-06 | Positive | 206407_s_at  |
| CCL13     | 6357   | Bos-204       | 0,163 | 2,002E-02 | Positive | 206407_s_at  |
| CCL13     | 6357   | Chin-124      | 0,259 | 3,644E-03 | Positive | 206407_s_at  |
| CCL13     | 6357   | EXPO-351      | 0,193 | 2,812E-04 | Positive | 206407_s_at  |
| CCL13     | 6357   | Jonsdottir-94 | 0,230 | 2,593E-02 | Positive | ILMN_1783593 |
| CCL13     | 6357   | Minn-96       | 0,401 | 5,131E-05 | Positive | 206407_s_at  |
| CCL13     | 6357   | Smid-210      | 0,174 | 1,144E-02 | Positive | 206407_s_at  |
| CCL13     | 6357   | Sotiriou-120  | 0,181 | 4,769E-02 | Positive | 206407_s_at  |
| CCL13     | 6357   | Wang-286      | 0,155 | 8,582E-03 | Positive | 206407_s_at  |
| CCL19     | 6363   | Bertucci-266  | 0,288 | 1,769E-06 | Positive | 210072_at    |
| CCL19     | 6363   | Black-107     | 0,224 | 2,020E-02 | Positive | 210072_at    |
| CCL19     | 6363   | Booser-508    | 0,145 | 1,075E-03 | Positive | 210072_at    |
| CCL19     | 6363   | Bos-204       | 0,249 | 3,268E-04 | Positive | 210072_at    |
| CCL19     | 6363   | Chin-124      | 0,234 | 8,760E-03 | Positive | 210072_at    |
| CCL19     | 6363   | Clynes-121    | 0,236 | 9,123E-03 | Positive | 210072_at    |
| CCL19     | 6363   | EXPO-351      | 0,164 | 2,083E-03 | Positive | 210072_at    |
| CCL19     | 6363   | Iglehart-123  | 0,308 | 5,374E-04 | Positive | 210072_at    |
| CCL19     | 6363   | Jonsdottir-94 | 0,204 | 4,873E-02 | Positive | ILMN_1769129 |
| CCL19     | 6363   | Smid-210      | 0,215 | 1,753E-03 | Positive | 210072_at    |
| CCL19     | 6363   | Wang-286      | 0,205 | 4,788E-04 | Positive | 210072_at    |
| CCL21     | 6366   | Bertucci-266  | 0,314 | 1,634E-07 | Positive | 204606_at    |
| CCL21     | 6366   | Booser-508    | 0,155 | 4,450E-04 | Positive | 204606_at    |
| CCL21     | 6366   | Bos-204       | 0,240 | 5,452E-04 | Positive | 204606_at    |
| CCL21     | 6366   | Chin-124      | 0,282 | 1,494E-03 | Positive | 204606_at    |
| CCL21     | 6366   | Clynes-121    | 0,319 | 3,571E-04 | Positive | 204606_at    |
| CCL21     | 6366   | Jonsdottir-94 | 0,282 | 5,812E-03 | Positive | ILMN_1677505 |
| CCL21     | 6366   | Smid-210      | 0,195 | 4,569E-03 | Positive | 204606_at    |
| CCL21     | 6366   | Sotiriou-120  | 0,239 | 8,622E-03 | Positive | 204606_at    |
| CCL21     | 6366   | Wang-286      | 0,120 | 4,316E-02 | Positive | 204606_at    |
| CCL4      | 6351   | Bertucci-266  | 0,242 | 6,475E-05 | Positive | 204103_at    |
| CCL4      | 6351   | Black-107     | 0,249 | 9,806E-03 | Positive | 204103_at    |
| CCL4      | 6351   | Booser-508    | 0,130 | 3,236E-03 | Positive | 204103_at    |
| CCL4      | 6351   | Bos-204       | 0,207 | 2,917E-03 | Positive | 204103_at    |
| CCL4      | 6351   | Clynes-121    | 0,337 | 1,563E-04 | Positive | 204103_at    |
| CCL4      | 6351   | Smid-210      | 0,217 | 1,555E-03 | Positive | 204103_at    |
| CCL4L2    | 9560   | Jonsdottir-94 | 0,209 | 4,339E-02 | Positive | ILMN_1716276 |
| CD14      | 929    | Bertucci-266  | 0,227 | 1,949E-04 | Positive | 201743_at    |
| CD14      | 929    | Black-107     | 0,279 | 3,588E-03 | Positive | 201743_at    |
| CD14      | 929    | Booser-508    | 0,213 | 1,344E-06 | Positive | 201743_at    |
| CD14      | 929    | Bos-204       | 0,230 | 9,327E-04 | Positive | 201743_at    |
| CD14      | 929    | Clynes-121    | 0,308 | 6,006E-04 | Positive | 201743_at    |
| CD14      | 929    | EXPO-351      | 0,188 | 3,889E-04 | Positive | 201743_at    |

| Gene name     | GeneID      | Dataset           | R             | P                | Sign            | Probe              |
|---------------|-------------|-------------------|---------------|------------------|-----------------|--------------------|
| CD14          | 929         | Iglehart-123      | 0,180         | 4,644E-02        | Positive        | 201743_at          |
| CD14          | 929         | Minn-96           | 0,386         | 1,042E-04        | Positive        | 201743_at          |
| CD14          | 929         | Servant-343       | 0,147         | 6,433E-03        | Positive        | ILMN_2396444       |
| CD14          | 929         | Smid-210          | 0,220         | 1,348E-03        | Positive        | 201743_at          |
| CD14          | 929         | Sotiriou-120      | 0,360         | 5,354E-05        | Positive        | 201743_at          |
| CD14          | 929         | Wang-286          | 0,216         | 2,400E-04        | Positive        | 201743_at          |
| CD40          | 958         | Bertucci-266      | 0,238         | 8,927E-05        | Positive        | 35150_at           |
| CD40          | 958         | Black-107         | 0,267         | 5,487E-03        | Positive        | 35150_at           |
| CD40          | 958         | Booser-508        | 0,319         | 1,625E-13        | Positive        | 35150_at           |
| CD40          | 958         | Chin-124          | 0,309         | 4,854E-04        | Positive        | 215346_at          |
| CD40          | 958         | Clynes-121        | 0,284         | 1,608E-03        | Positive        | 215346_at          |
| CD40          | 958         | EXPO-351          | 0,148         | 5,403E-03        | Positive        | 35150_at           |
| CD40          | 958         | Jonsdottir-94     | 0,398         | 7,202E-05        | Positive        | ILMN_1779257       |
| CD40          | 958         | Minn-96           | 0,330         | 1,044E-03        | Positive        | 35150_at           |
| CD40LG        | 959         | Bertucci-266      | 0,219         | 3,195E-04        | Positive        | 207892_at          |
| CD40LG        | 959         | Booser-508        | 0,210         | 1,711E-06        | Positive        | 207892_at          |
| CD40LG        | 959         | Bos-204           | 0,179         | 1,057E-02        | Positive        | 207892_at          |
| CD40LG        | 959         | Iglehart-123      | 0,334         | 1,618E-04        | Positive        | 207892_at          |
| CD40LG        | 959         | Jonsdottir-94     | 0,290         | 4,536E-03        | Positive        | ILMN_1659077       |
| CD40LG        | 959         | Smid-210          | 0,136         | 4,970E-02        | Positive        | 207892_at          |
| CFLAR         | 8837        | Bertucci-266      | 0,256         | 2,407E-05        | Positive        | 239629_at          |
| CFLAR         | 8837        | Booser-508        | 0,302         | 3,661E-12        | Positive        | 211316_x_at        |
| CFLAR         | 8837        | Bos-204           | 0,236         | 6,795E-04        | Positive        | 209939_x_at        |
| CFLAR         | 8837        | Chin-124          | 0,265         | 2,963E-03        | Positive        | 209939_x_at        |
| CFLAR         | 8837        | EXPO-351          | 0,211         | 6,555E-05        | Positive        | 239629_at          |
| CFLAR         | 8837        | Iglehart-123      | 0,221         | 1,387E-02        | Positive        | 209939_x_at        |
| CFLAR         | 8837        | Smid-210          | 0,220         | 1,336E-03        | Positive        | 209939_x_at        |
| CFLAR         | 8837        | Wang-286          | 0,286         | 8,733E-07        | Positive        | 209939_x_at        |
| <b>CHUK</b>   | <b>1147</b> | <b>Bos-204</b>    | <b>-0,143</b> | <b>4,151E-02</b> | <b>Negative</b> | <b>209666_s_at</b> |
| CSNK2A2       | 1459        | Bertucci-266      | 0,390         | 4,229E-11        | Positive        | 224922_at          |
| CSNK2A2       | 1459        | Black-107         | 0,210         | 3,013E-02        | Positive        | 224922_at          |
| CSNK2A2       | 1459        | Booser-508        | 0,116         | 9,078E-03        | Positive        | 203575_at          |
| CSNK2A2       | 1459        | EXPO-351          | 0,180         | 7,147E-04        | Positive        | 224922_at          |
| CSNK2A2       | 1459        | Jonsdottir-94     | 0,218         | 3,452E-02        | Positive        | ILMN_1723843       |
| CSNK2A2       | 1459        | Sotiriou-120      | 0,189         | 3,858E-02        | Positive        | 224922_at          |
| CSNK2A2       | 1459        | Sotiriou-198      | 0,252         | 3,355E-04        | Positive        | 203575_at          |
| CSNK2A2       | 1459        | Wang-286          | 0,294         | 4,262E-07        | Positive        | 203575_at          |
| <b>CSNK2B</b> | <b>1460</b> | <b>Booser-508</b> | <b>-0,137</b> | <b>2,027E-03</b> | <b>Negative</b> | <b>201390_s_at</b> |
| CSNK2B        | 1460        | Jonsdottir-94     | 0,329         | 1,222E-03        | Positive        | ILMN_1800461       |
| CXCL12        | 6387        | Bertucci-266      | 0,259         | 1,892E-05        | Positive        | 209687_at          |
| CXCL12        | 6387        | Black-107         | 0,391         | 3,056E-05        | Positive        | 209687_at          |
| CXCL12        | 6387        | Bos-204           | 0,220         | 1,543E-03        | Positive        | 209687_at          |
| CXCL12        | 6387        | Chin-124          | 0,210         | 1,946E-02        | Positive        | 209687_at          |
| CXCL12        | 6387        | Clynes-121        | 0,304         | 6,909E-04        | Positive        | 209687_at          |
| CXCL12        | 6387        | EXPO-351          | 0,186         | 4,631E-04        | Positive        | 209687_at          |
| CXCL12        | 6387        | Servant-343       | 0,114         | 3,523E-02        | Positive        | ILMN_1791447       |
| CXCL12        | 6387        | Smid-210          | 0,170         | 1,378E-02        | Positive        | 209687_at          |
| CXCL12        | 6387        | Sotiriou-120      | 0,421         | 1,673E-06        | Positive        | 209687_at          |
| CXCL12        | 6387        | Sotiriou-198      | 0,155         | 2,954E-02        | Positive        | 209687_at          |
| CXCL2         | 2920        | Bertucci-266      | 0,333         | 2,569E-08        | Positive        | 209774_x_at        |
| CXCL2         | 2920        | Black-107         | 0,206         | 3,361E-02        | Positive        | 209774_x_at        |
| CXCL2         | 2920        | Booser-508        | 0,198         | 6,920E-06        | Positive        | 209774_x_at        |
| CXCL2         | 2920        | Bos-204           | 0,442         | 3,600E-11        | Positive        | 209774_x_at        |
| CXCL2         | 2920        | Chin-124          | 0,345         | 8,711E-05        | Positive        | 209774_x_at        |
| CXCL2         | 2920        | Clynes-121        | 0,213         | 1,915E-02        | Positive        | 209774_x_at        |
| CXCL2         | 2920        | EXPO-351          | 0,195         | 2,290E-04        | Positive        | 209774_x_at        |
| CXCL2         | 2920        | Iglehart-123      | 0,268         | 2,766E-03        | Positive        | 209774_x_at        |
| CXCL2         | 2920        | Minn-96           | 0,284         | 5,104E-03        | Positive        | 209774_x_at        |

| Gene name   | GeneID | Dataset       | R      | P         | Sign     | Probe        |
|-------------|--------|---------------|--------|-----------|----------|--------------|
| CXCL2       | 2920   | Smid-210      | 0,407  | 8,978E-10 | Positive | 209774_x_at  |
| CXCL2       | 2920   | Sotiriou-198  | 0,290  | 3,360E-05 | Positive | 209774_x_at  |
| CXCL2       | 2920   | Wang-286      | 0,247  | 2,319E-05 | Positive | 209774_x_at  |
| DDX58       | 23586  | Bos-204       | 0,211  | 2,490E-03 | Positive | 218943_s_at  |
| DDX58       | 23586  | Smid-210      | 0,226  | 9,475E-04 | Positive | 218943_s_at  |
| ERC1        | 23085  | Bertucci-266  | 0,138  | 2,420E-02 | Positive | 215606_s_at  |
| ERC1        | 23085  | Booser-508    | 0,223  | 3,864E-07 | Positive | 215606_s_at  |
| ERC1        | 23085  | EXPO-351      | 0,135  | 1,139E-02 | Positive | 226049_at    |
| GADD45B     | 4616   | Bertucci-266  | 0,207  | 7,000E-04 | Positive | 207574_s_at  |
| GADD45B     | 4616   | Bos-204       | 0,153  | 2,927E-02 | Positive | 207574_s_at  |
| GADD45B     | 4616   | Smid-210      | 0,139  | 4,396E-02 | Positive | 207574_s_at  |
| GADD45B     | 4616   | Sotiriou-120  | 0,269  | 2,929E-03 | Positive | 207574_s_at  |
| GADD45B     | 4616   | Wang-286      | 0,214  | 2,673E-04 | Positive | 207574_s_at  |
| ICAM1       | 3383   | Bertucci-266  | 0,357  | 1,958E-09 | Positive | 202637_s_at  |
| ICAM1       | 3383   | Booser-508    | 0,194  | 1,052E-05 | Positive | 202637_s_at  |
| ICAM1       | 3383   | Bos-204       | 0,295  | 1,859E-05 | Positive | 202637_s_at  |
| ICAM1       | 3383   | Chin-124      | 0,207  | 2,092E-02 | Positive | 202637_s_at  |
| ICAM1       | 3383   | Clynes-121    | 0,350  | 8,457E-05 | Positive | 202637_s_at  |
| ICAM1       | 3383   | EXPO-351      | 0,120  | 2,485E-02 | Positive | 202637_s_at  |
| ICAM1       | 3383   | Minn-96       | 0,337  | 7,788E-04 | Positive | 202637_s_at  |
| ICAM1       | 3383   | Smid-210      | 0,280  | 3,882E-05 | Positive | 202637_s_at  |
| ICAM1       | 3383   | Sotiriou-198  | 0,151  | 3,378E-02 | Positive | 202637_s_at  |
| ICAM1       | 3383   | Wang-286      | 0,270  | 3,489E-06 | Positive | 202637_s_at  |
| IKBKB       | 3351   | Bertucci-266  | -0,154 | 1,181E-02 | Negative | 209341_s_at  |
| IKBKB       | 3351   | Booser-508    | -0,199 | 6,332E-06 | Negative | 209341_s_at  |
| IKBKB       | 3351   | Chin-124      | -0,182 | 4,360E-02 | Negative | 209341_s_at  |
| IKBKB       | 3351   | EXPO-351      | -0,152 | 4,388E-03 | Negative | 209341_s_at  |
| IKBKB       | 3351   | Minn-96       | -0,219 | 3,180E-02 | Negative | 209341_s_at  |
| IKBKB       | 3351   | Wang-286      | -0,222 | 1,524E-04 | Negative | 209341_s_at  |
| IKBKG       | 8517   | Booser-508    | 0,229  | 1,824E-07 | Positive | 36004_at     |
| IKBKG       | 8517   | Servant-343   | 0,115  | 3,386E-02 | Positive | ILMN_1707308 |
| IL1B        | 3553   | Bertucci-266  | 0,233  | 1,260E-04 | Positive | 205067_at    |
| IL1B        | 3553   | Black-107     | 0,232  | 1,605E-02 | Positive | 205067_at    |
| IL1B        | 3553   | Booser-508    | 0,245  | 2,212E-08 | Positive | 205067_at    |
| IL1B        | 3553   | Bos-204       | 0,310  | 6,314E-06 | Positive | 205067_at    |
| IL1B        | 3553   | Clynes-121    | 0,282  | 1,696E-03 | Positive | 205067_at    |
| IL1B        | 3553   | Minn-96       | 0,219  | 3,207E-02 | Positive | 205067_at    |
| IL1B        | 3553   | Smid-210      | 0,299  | 1,008E-05 | Positive | 205067_at    |
| IL1B        | 3553   | Wang-286      | 0,129  | 2,975E-02 | Positive | 205067_at    |
| IL1R1       | 3554   | Bertucci-266  | 0,273  | 6,353E-06 | Positive | 202948_at    |
| IL1R1       | 3554   | Black-107     | 0,355  | 1,732E-04 | Positive | 202948_at    |
| IL1R1       | 3554   | Booser-508    | 0,128  | 3,826E-03 | Positive | 202948_at    |
| IL1R1       | 3554   | Bos-204       | 0,188  | 7,044E-03 | Positive | 202948_at    |
| IL1R1       | 3554   | Chin-124      | 0,316  | 3,548E-04 | Positive | 202948_at    |
| IL1R1       | 3554   | EXPO-351      | 0,254  | 1,438E-06 | Positive | 202948_at    |
| IL1R1       | 3554   | Minn-96       | 0,301  | 2,921E-03 | Positive | 202948_at    |
| IL1R1       | 3554   | Sotiriou-120  | 0,410  | 3,255E-06 | Positive | 202948_at    |
| IL1R1       | 3554   | Sotiriou-198  | 0,265  | 1,589E-04 | Positive | 202948_at    |
| IL1R1       | 3554   | Wang-286      | 0,169  | 4,134E-03 | Positive | 202948_at    |
| IL8 (CXCL8) | 3576   | Bertucci-266  | 0,237  | 9,382E-05 | Positive | 202859_x_at  |
| IL8 (CXCL8) | 3576   | Booser-508    | 0,175  | 7,428E-05 | Positive | 202859_x_at  |
| IL8 (CXCL8) | 3576   | Bos-204       | 0,245  | 4,071E-04 | Positive | 202859_x_at  |
| IL8 (CXCL8) | 3576   | Chin-124      | 0,187  | 3,757E-02 | Positive | 202859_x_at  |
| IL8 (CXCL8) | 3576   | Clynes-121    | 0,280  | 1,838E-03 | Positive | 202859_x_at  |
| IL8 (CXCL8) | 3576   | Jonsdottir-94 | 0,279  | 6,495E-03 | Positive | ILMN_2184373 |
| IL8 (CXCL8) | 3576   | Minn-96       | 0,269  | 8,062E-03 | Positive | 202859_x_at  |
| IL8 (CXCL8) | 3576   | Smid-210      | 0,220  | 1,360E-03 | Positive | 202859_x_at  |
| IL8 (CXCL8) | 3576   | Wang-286      | 0,270  | 3,649E-06 | Positive | 202859_x_at  |

| Gene name | GeneID | Dataset       | R      | P         | Sign     | Probe        |
|-----------|--------|---------------|--------|-----------|----------|--------------|
| IRAK1     | 3654   | Bertucci-266  | 0,196  | 1,302E-03 | Positive | 201587_s_at  |
| IRAK1     | 3654   | Bos-204       | 0,175  | 1,212E-02 | Positive | 201587_s_at  |
| IRAK1     | 3654   | Chin-124      | 0,208  | 2,026E-02 | Positive | 201587_s_at  |
| IRAK1     | 3654   | EXPO-351      | 0,131  | 1,422E-02 | Positive | 201587_s_at  |
| IRAK1     | 3654   | Smid-210      | 0,197  | 4,136E-03 | Positive | 201587_s_at  |
| IRAK1     | 3654   | Sotiriou-198  | 0,146  | 4,059E-02 | Positive | 201587_s_at  |
| IRAK1     | 3654   | Wang-286      | 0,242  | 3,398E-05 | Positive | 201587_s_at  |
| IRAK4     | 51135  | Bertucci-266  | -0,135 | 2,822E-02 | Negative | 219618_at    |
| IRAK4     | 51135  | Booser-508    | 0,155  | 4,524E-04 | Positive | 219618_at    |
| LAT       | 27040  | Booser-508    | 0,091  | 3,942E-02 | Positive | 209881_s_at  |
| LAT       | 27040  | Bos-204       | 0,151  | 3,128E-02 | Positive | 209881_s_at  |
| LAT       | 27040  | Chin-124      | 0,302  | 6,518E-04 | Positive | 211005_at    |
| LAT       | 27040  | Jonsdottir-94 | 0,204  | 4,834E-02 | Positive | ILMN_2404625 |
| LAT       | 27040  | Servant-343   | 0,114  | 3,542E-02 | Positive | ILMN_2404625 |
| LAT       | 27040  | Smid-210      | 0,171  | 1,334E-02 | Positive | 209881_s_at  |
| LBP       | 3929   | Bertucci-266  | 0,253  | 2,889E-05 | Positive | 214461_at    |
| LBP       | 3929   | Booser-508    | 0,147  | 8,971E-04 | Positive | 214461_at    |
| LBP       | 3929   | Bos-204       | 0,188  | 6,998E-03 | Positive | 214461_at    |
| LBP       | 3929   | Chin-124      | 0,202  | 2,421E-02 | Positive | 214461_at    |
| LBP       | 3929   | EXPO-351      | 0,119  | 2,529E-02 | Positive | 211652_s_at  |
| LBP       | 3929   | Smid-210      | 0,205  | 2,800E-03 | Positive | 214461_at    |
| LBP       | 3929   | Wang-286      | 0,189  | 1,303E-03 | Positive | 214461_at    |
| LCK       | 3932   | Bertucci-266  | 0,374  | 3,078E-10 | Positive | 204891_s_at  |
| LCK       | 3932   | Black-107     | 0,263  | 6,149E-03 | Positive | 204891_s_at  |
| LCK       | 3932   | Booser-508    | 0,165  | 1,802E-04 | Positive | 204890_s_at  |
| LCK       | 3932   | Bos-204       | 0,220  | 1,607E-03 | Positive | 204891_s_at  |
| LCK       | 3932   | Chin-124      | 0,236  | 8,320E-03 | Positive | 204890_s_at  |
| LCK       | 3932   | Clynes-121    | 0,324  | 2,841E-04 | Positive | 204891_s_at  |
| LCK       | 3932   | EXPO-351      | 0,143  | 7,094E-03 | Positive | 204891_s_at  |
| LCK       | 3932   | Iglehart-123  | 0,333  | 1,688E-04 | Positive | 204891_s_at  |
| LCK       | 3932   | Smid-210      | 0,201  | 3,406E-03 | Positive | 204891_s_at  |
| LTA       | 4049   | Bertucci-266  | 0,183  | 2,722E-03 | Positive | 206975_at    |
| LTA       | 4049   | Booser-508    | 0,257  | 4,286E-09 | Positive | 206975_at    |
| LTA       | 4049   | Jonsdottir-94 | 0,232  | 2,427E-02 | Positive | ILMN_1795464 |
| LTB       | 4050   | Bertucci-266  | 0,240  | 7,892E-05 | Positive | 207339_s_at  |
| LTB       | 4050   | Booser-508    | 0,141  | 1,424E-03 | Positive | 207339_s_at  |
| LTB       | 4050   | Bos-204       | 0,236  | 6,945E-04 | Positive | 207339_s_at  |
| LTB       | 4050   | Chin-124      | 0,252  | 4,697E-03 | Positive | 207339_s_at  |
| LTB       | 4050   | Clynes-121    | 0,276  | 2,217E-03 | Positive | 207339_s_at  |
| LTB       | 4050   | Iglehart-123  | 0,371  | 2,431E-05 | Positive | 207339_s_at  |
| LTB       | 4050   | Jonsdottir-94 | 0,216  | 3,654E-02 | Positive | ILMN_2376205 |
| LTB       | 4050   | Minn-96       | 0,207  | 4,266E-02 | Positive | 207339_s_at  |
| LTB       | 4050   | Smid-210      | 0,235  | 5,906E-04 | Positive | 207339_s_at  |
| LTB       | 4050   | Sotiriou-120  | 0,220  | 1,575E-02 | Positive | 207339_s_at  |
| LTB       | 4050   | Wang-286      | 0,227  | 1,101E-04 | Positive | 207339_s_at  |
| LTBR      | 4055   | EXPO-351      | 0,117  | 2,779E-02 | Positive | 203005_at    |
| LTBR      | 4055   | Jonsdottir-94 | 0,292  | 4,288E-03 | Positive | ILMN_1667476 |
| LTBR      | 4055   | Servant-343   | -0,124 | 2,113E-02 | Negative | ILMN_1667476 |
| LTBR      | 4055   | Sotiriou-120  | -0,225 | 1,358E-02 | Negative | 203005_at    |
| LTBR      | 4055   | Wang-286      | 0,198  | 7,666E-04 | Positive | 203005_at    |
| LY96      | 23643  | Bertucci-266  | 0,299  | 6,633E-07 | Positive | 206584_at    |
| LY96      | 23643  | Black-107     | 0,379  | 5,622E-05 | Positive | 206584_at    |
| LY96      | 23643  | Booser-508    | 0,253  | 7,049E-09 | Positive | 206584_at    |
| LY96      | 23643  | Bos-204       | 0,342  | 5,643E-07 | Positive | 206584_at    |
| LY96      | 23643  | Chin-124      | 0,307  | 5,218E-04 | Positive | 206584_at    |
| LY96      | 23643  | Clynes-121    | 0,464  | 8,023E-08 | Positive | 206584_at    |
| LY96      | 23643  | EXPO-351      | 0,249  | 2,432E-06 | Positive | 206584_at    |
| LY96      | 23643  | Iglehart-123  | 0,282  | 1,585E-03 | Positive | 206584_at    |

| Gene name | GeneID | Dataset       | R      | P         | Sign     | Probe        |
|-----------|--------|---------------|--------|-----------|----------|--------------|
| LY96      | 23643  | Jonsdottir-94 | 0,289  | 4,714E-03 | Positive | ILMN_1724533 |
| LY96      | 23643  | Smid-210      | 0,313  | 3,796E-06 | Positive | 206584_at    |
| LY96      | 23643  | Sotiriou-120  | 0,312  | 5,233E-04 | Positive | 206584_at    |
| LY96      | 23643  | Sotiriou-198  | 0,142  | 4,618E-02 | Positive | 206584_at    |
| LY96      | 23643  | Wang-286      | 0,231  | 7,930E-05 | Positive | 206584_at    |
| LYN       | 4067   | Bertucci-266  | 0,320  | 9,757E-08 | Positive | 210754_s_at  |
| LYN       | 4067   | Black-107     | 0,220  | 2,302E-02 | Positive | 202625_at    |
| LYN       | 4067   | Booser-508    | 0,261  | 2,245E-09 | Positive | 210754_s_at  |
| LYN       | 4067   | Bos-204       | 0,395  | 4,825E-09 | Positive | 210754_s_at  |
| LYN       | 4067   | Chin-124      | 0,259  | 3,684E-03 | Positive | 202625_at    |
| LYN       | 4067   | Clynes-121    | 0,387  | 1,151E-05 | Positive | 202625_at    |
| LYN       | 4067   | EXPO-351      | 0,223  | 2,478E-05 | Positive | 210754_s_at  |
| LYN       | 4067   | Iglehart-123  | 0,346  | 8,992E-05 | Positive | 210754_s_at  |
| LYN       | 4067   | Jonsdottir-94 | 0,215  | 3,727E-02 | Positive | ILMN_1781155 |
| LYN       | 4067   | Minn-96       | 0,334  | 8,722E-04 | Positive | 210754_s_at  |
| LYN       | 4067   | Smid-210      | 0,405  | 1,086E-09 | Positive | 210754_s_at  |
| LYN       | 4067   | Sotiriou-198  | 0,202  | 4,267E-03 | Positive | 202626_s_at  |
| LYN       | 4067   | Wang-286      | 0,336  | 5,434E-09 | Positive | 202626_s_at  |
| MALT1     | 10892  | Bertucci-266  | 0,322  | 7,818E-08 | Positive | 210017_at    |
| MALT1     | 10892  | Booser-508    | 0,220  | 5,416E-07 | Positive | 210018_x_at  |
| MALT1     | 10892  | Bos-204       | 0,227  | 1,094E-03 | Positive | 210017_at    |
| MALT1     | 10892  | Chin-124      | 0,232  | 9,663E-03 | Positive | 210017_at    |
| MALT1     | 10892  | EXPO-351      | 0,112  | 3,593E-02 | Positive | 208309_s_at  |
| MALT1     | 10892  | Iglehart-123  | 0,225  | 1,229E-02 | Positive | 208309_s_at  |
| MALT1     | 10892  | Smid-210      | 0,167  | 1,550E-02 | Positive | 210017_at    |
| MALT1     | 10892  | Sotiriou-198  | 0,194  | 6,091E-03 | Positive | 210018_x_at  |
| MALT1     | 10892  | Wang-286      | 0,168  | 4,366E-03 | Positive | 210018_x_at  |
| MAP3K14   | 9020   | Bertucci-266  | 0,247  | 4,636E-05 | Positive | 205192_at    |
| MAP3K14   | 9020   | Black-107     | 0,209  | 3,074E-02 | Positive | 205192_at    |
| MAP3K14   | 9020   | Booser-508    | 0,182  | 3,794E-05 | Positive | 205192_at    |
| MAP3K14   | 9020   | Bos-204       | 0,265  | 1,313E-04 | Positive | 205192_at    |
| MAP3K14   | 9020   | EXPO-351      | 0,119  | 2,595E-02 | Positive | 205192_at    |
| MAP3K14   | 9020   | Jonsdottir-94 | 0,397  | 7,368E-05 | Positive | ILMN_1724070 |
| MAP3K14   | 9020   | Smid-210      | 0,249  | 2,646E-04 | Positive | 205192_at    |
| MAP3K14   | 9020   | Wang-286      | 0,116  | 4,924E-02 | Positive | 205192_at    |
| MAP3K7    | 6885   | Bertucci-266  | 0,226  | 2,000E-04 | Positive | 206854_s_at  |
| MAP3K7    | 6885   | Booser-508    | 0,163  | 2,165E-04 | Positive | 206853_s_at  |
| MAP3K7    | 6885   | Bos-204       | 0,182  | 9,069E-03 | Positive | 206854_s_at  |
| MAP3K7    | 6885   | EXPO-351      | 0,133  | 1,291E-02 | Positive | 206854_s_at  |
| MAP3K7    | 6885   | Iglehart-123  | 0,194  | 3,187E-02 | Positive | 211537_x_at  |
| MAP3K7    | 6885   | Smid-210      | 0,203  | 3,081E-03 | Positive | 206854_s_at  |
| MYD88     | 4615   | Bertucci-266  | 0,255  | 2,587E-05 | Positive | 209124_at    |
| MYD88     | 4615   | Booser-508    | 0,189  | 1,838E-05 | Positive | 209124_at    |
| MYD88     | 4615   | Bos-204       | 0,247  | 3,590E-04 | Positive | 209124_at    |
| MYD88     | 4615   | Chin-124      | 0,193  | 3,146E-02 | Positive | 209124_at    |
| MYD88     | 4615   | Jonsdottir-94 | 0,217  | 3,598E-02 | Positive | ILMN_1738523 |
| MYD88     | 4615   | Smid-210      | 0,235  | 5,801E-04 | Positive | 209124_at    |
| MYD88     | 4615   | Wang-286      | 0,147  | 1,296E-02 | Positive | 209124_at    |
| NFKB1     | 4790   | Bertucci-266  | 0,127  | 3,857E-02 | Positive | 209239_at    |
| NFKB1     | 4790   | Booser-508    | 0,136  | 2,059E-03 | Positive | 209239_at    |
| NFKB1     | 4790   | Servant-343   | 0,126  | 1,961E-02 | Positive | ILMN_1714965 |
| NFKB1     | 4790   | Wang-286      | -0,155 | 8,856E-03 | Negative | 209239_at    |
| NFKB2     | 4791   | Bertucci-266  | 0,128  | 3,647E-02 | Positive | 207535_s_at  |
| NFKB2     | 4791   | Booser-508    | 0,121  | 6,352E-03 | Positive | 207535_s_at  |
| NFKB2     | 4791   | Servant-343   | -0,118 | 2,859E-02 | Negative | ILMN_1799062 |
| NFKBIA    | 4792   | EXPO-351      | 0,110  | 3,875E-02 | Positive | 201502_s_at  |
| NFKBIA    | 4792   | Servant-343   | 0,121  | 2,480E-02 | Positive | ILMN_1773154 |
| PARP1     | 142    | Booser-508    | -0,128 | 3,840E-03 | Negative | 208644_at    |

| Gene name | GeneID | Dataset       | R      | P         | Sign     | Probe        |
|-----------|--------|---------------|--------|-----------|----------|--------------|
| PARP1     | 142    | Iglehart-123  | -0,277 | 1,958E-03 | Negative | 208644_at    |
| PARP1     | 142    | Minn-96       | -0,219 | 3,191E-02 | Negative | 208644_at    |
| PARP1     | 142    | Sotiriou-120  | -0,224 | 1,410E-02 | Negative | 208644_at    |
| PARP1     | 142    | Wang-286      | -0,121 | 4,086E-02 | Negative | 208644_at    |
| PIAS4     | 51588  | Bertucci-266  | -0,252 | 3,164E-05 | Negative | 212879_x_at  |
| PIAS4     | 51588  | Clynes-121    | -0,184 | 4,282E-02 | Negative | 212879_x_at  |
| PIAS4     | 51588  | Iglehart-123  | -0,194 | 3,164E-02 | Negative | 212879_x_at  |
| PIAS4     | 51588  | Minn-96       | -0,267 | 8,502E-03 | Negative | 212881_at    |
| PIAS4     | 51588  | Servant-343   | 0,110  | 4,218E-02 | Positive | ILMN_1802905 |
| PIAS4     | 51588  | Sotiriou-198  | -0,183 | 9,822E-03 | Negative | 212879_x_at  |
| PIDD      | 55367  | Wang-286      | -0,192 | 1,087E-03 | Negative | 221640_s_at  |
| PLAU      | 5328   | Bertucci-266  | 0,234  | 1,150E-04 | Positive | 205479_s_at  |
| PLAU      | 5328   | Black-107     | 0,235  | 1,498E-02 | Positive | 205479_s_at  |
| PLAU      | 5328   | Booser-508    | 0,179  | 4,962E-05 | Positive | 205479_s_at  |
| PLAU      | 5328   | Bos-204       | 0,308  | 7,430E-06 | Positive | 205479_s_at  |
| PLAU      | 5328   | Clynes-121    | 0,204  | 2,490E-02 | Positive | 205479_s_at  |
| PLAU      | 5328   | EXPO-351      | 0,118  | 2,711E-02 | Positive | 205479_s_at  |
| PLAU      | 5328   | Smid-210      | 0,289  | 2,159E-05 | Positive | 205479_s_at  |
| PLAU      | 5328   | Sotiriou-120  | 0,313  | 5,091E-04 | Positive | 205479_s_at  |
| PLAU      | 5328   | Wang-286      | 0,199  | 7,279E-04 | Positive | 205479_s_at  |
| PLCG1     | 5335   | Bertucci-266  | 0,208  | 6,537E-04 | Positive | 202789_at    |
| PLCG1     | 5335   | Booser-508    | 0,099  | 2,624E-02 | Positive | 202789_at    |
| PLCG1     | 5335   | Smid-210      | 0,157  | 2,309E-02 | Positive | 202789_at    |
| PLCG2     | 5336   | Bertucci-266  | 0,417  | 1,313E-12 | Positive | 204613_at    |
| PLCG2     | 5336   | Black-107     | 0,258  | 7,262E-03 | Positive | 204613_at    |
| PLCG2     | 5336   | Booser-508    | 0,352  | 2,852E-16 | Positive | 204613_at    |
| PLCG2     | 5336   | Bos-204       | 0,264  | 1,323E-04 | Positive | 204613_at    |
| PLCG2     | 5336   | Chin-124      | 0,285  | 1,321E-03 | Positive | 204613_at    |
| PLCG2     | 5336   | Clynes-121    | 0,302  | 7,620E-04 | Positive | 204613_at    |
| PLCG2     | 5336   | EXPO-351      | 0,280  | 9,536E-08 | Positive | 204613_at    |
| PLCG2     | 5336   | Iglehart-123  | 0,262  | 3,468E-03 | Positive | 204613_at    |
| PLCG2     | 5336   | Jonsdottir-94 | 0,376  | 1,870E-04 | Positive | ILMN_1815719 |
| PLCG2     | 5336   | Minn-96       | 0,294  | 3,601E-03 | Positive | 204613_at    |
| PLCG2     | 5336   | Smid-210      | 0,228  | 8,692E-04 | Positive | 204613_at    |
| PLCG2     | 5336   | Sotiriou-120  | 0,207  | 2,325E-02 | Positive | 204613_at    |
| PLCG2     | 5336   | Sotiriou-198  | 0,173  | 1,483E-02 | Positive | 204613_at    |
| PLCG2     | 5336   | Wang-286      | 0,307  | 1,176E-07 | Positive | 204613_at    |
| PRKCB     | 5579   | Bertucci-266  | 0,316  | 1,394E-07 | Positive | 209685_s_at  |
| PRKCB     | 5579   | Black-107     | 0,255  | 8,052E-03 | Positive | 209685_s_at  |
| PRKCB     | 5579   | Booser-508    | 0,278  | 1,717E-10 | Positive | 209685_s_at  |
| PRKCB     | 5579   | Chin-124      | 0,249  | 5,316E-03 | Positive | 209685_s_at  |
| PRKCB     | 5579   | Clynes-121    | 0,390  | 9,629E-06 | Positive | 209685_s_at  |
| PRKCB     | 5579   | EXPO-351      | 0,183  | 5,789E-04 | Positive | 209685_s_at  |
| PRKCB     | 5579   | Iglehart-123  | 0,353  | 6,358E-05 | Positive | 209685_s_at  |
| PRKCB     | 5579   | Minn-96       | 0,235  | 2,113E-02 | Positive | 209685_s_at  |
| PRKCB     | 5579   | Sotiriou-120  | 0,260  | 4,063E-03 | Positive | 209685_s_at  |
| PRKCB     | 5579   | Wang-286      | 0,220  | 1,781E-04 | Positive | 209685_s_at  |
| PRKCQ     | 5588   | Bertucci-266  | 0,372  | 3,851E-10 | Positive | 210038_at    |
| PRKCQ     | 5588   | Black-107     | 0,220  | 2,290E-02 | Positive | 210038_at    |
| PRKCQ     | 5588   | Booser-508    | 0,300  | 4,843E-12 | Positive | 210038_at    |
| PRKCQ     | 5588   | Bos-204       | 0,181  | 9,694E-03 | Positive | 210038_at    |
| PRKCQ     | 5588   | Chin-124      | 0,269  | 2,502E-03 | Positive | 210038_at    |
| PRKCQ     | 5588   | EXPO-351      | 0,158  | 2,938E-03 | Positive | 210038_at    |
| PRKCQ     | 5588   | Jonsdottir-94 | 0,243  | 1,807E-02 | Positive | ILMN_1733421 |
| PRKCQ     | 5588   | Minn-96       | 0,203  | 4,710E-02 | Positive | 210038_at    |
| PRKCQ     | 5588   | Smid-210      | 0,146  | 3,420E-02 | Positive | 210038_at    |
| PRKCQ     | 5588   | Wang-286      | 0,162  | 6,176E-03 | Positive | 210038_at    |
| PTGS2     | 5743   | Bertucci-266  | 0,260  | 1,758E-05 | Positive | 204748_at    |



| Gene name | GeneID | Dataset       | R      | P         | Sign     | Probe        |
|-----------|--------|---------------|--------|-----------|----------|--------------|
| PTGS2     | 5743   | Booser-508    | 0,211  | 1,649E-06 | Positive | 204748_at    |
| PTGS2     | 5743   | Bos-204       | 0,363  | 9,280E-08 | Positive | 204748_at    |
| PTGS2     | 5743   | Chin-124      | 0,282  | 1,503E-03 | Positive | 204748_at    |
| PTGS2     | 5743   | Clynes-121    | 0,264  | 3,445E-03 | Positive | 204748_at    |
| PTGS2     | 5743   | EXPO-351      | 0,105  | 4,833E-02 | Positive | 204748_at    |
| PTGS2     | 5743   | Minn-96       | 0,380  | 1,369E-04 | Positive | 204748_at    |
| PTGS2     | 5743   | Smid-210      | 0,320  | 2,171E-06 | Positive | 204748_at    |
| PTGS2     | 5743   | Sotiriou-198  | 0,275  | 8,921E-05 | Positive | 204748_at    |
| PTGS2     | 5743   | Wang-286      | 0,321  | 2,748E-08 | Positive | 204748_at    |
| RELA      | 5970   | Bertucci-266  | 0,135  | 2,746E-02 | Positive | 201783_s_at  |
| RELA      | 5970   | Jonsdottir-94 | 0,362  | 3,325E-04 | Positive | ILMN_1705266 |
| RELB      | 5971   | Bertucci-266  | 0,319  | 1,038E-07 | Positive | 205205_at    |
| RELB      | 5971   | Booser-508    | 0,131  | 3,142E-03 | Positive | 205205_at    |
| RELB      | 5971   | Jonsdottir-94 | 0,418  | 2,721E-05 | Positive | ILMN_1811258 |
| RELB      | 5971   | Minn-96       | 0,269  | 8,158E-03 | Positive | 205205_at    |
| RELB      | 5971   | Smid-210      | 0,139  | 4,379E-02 | Positive | 205205_at    |
| RELB      | 5971   | Wang-286      | 0,129  | 2,946E-02 | Positive | 205205_at    |
| SYK       | 6850   | Bertucci-266  | 0,278  | 4,136E-06 | Positive | 226068_at    |
| SYK       | 6850   | Black-107     | 0,239  | 1,315E-02 | Positive | 226068_at    |
| SYK       | 6850   | Booser-508    | 0,156  | 4,171E-04 | Positive | 207540_s_at  |
| SYK       | 6850   | Bos-204       | 0,212  | 2,380E-03 | Positive | 226068_at    |
| SYK       | 6850   | Clynes-121    | 0,220  | 1,550E-02 | Positive | 207540_s_at  |
| SYK       | 6850   | EXPO-351      | 0,160  | 2,696E-03 | Positive | 226068_at    |
| SYK       | 6850   | Iglehart-123  | 0,194  | 3,156E-02 | Positive | 226068_at    |
| SYK       | 6850   | Jonsdottir-94 | 0,311  | 2,265E-03 | Positive | ILMN_2059549 |
| SYK       | 6850   | Minn-96       | 0,260  | 1,037E-02 | Positive | 207540_s_at  |
| SYK       | 6850   | Servant-343   | 0,111  | 4,029E-02 | Positive | ILMN_2059549 |
| SYK       | 6850   | Smid-210      | 0,183  | 7,684E-03 | Positive | 226068_at    |
| SYK       | 6850   | Sotiriou-120  | 0,238  | 8,926E-03 | Positive | 207540_s_at  |
| TAB1      | 10454  | Bertucci-266  | -0,137 | 2,494E-02 | Negative | 203901_at    |
| TAB1      | 10454  | Bos-204       | -0,175 | 1,207E-02 | Negative | 203901_at    |
| TAB1      | 10454  | Clynes-121    | -0,251 | 5,447E-03 | Negative | 203901_at    |
| TAB1      | 10454  | Minn-96       | -0,203 | 4,741E-02 | Negative | 203901_at    |
| TAB1      | 10454  | Smid-210      | -0,223 | 1,119E-03 | Negative | 203901_at    |
| TAB1      | 10454  | Wang-286      | -0,149 | 1,188E-02 | Negative | 203901_at    |
| TAB2      | 23118  | Bertucci-266  | 0,236  | 1,040E-04 | Positive | 212184_s_at  |
| TAB2      | 23118  | Booser-508    | 0,154  | 5,011E-04 | Positive | 210284_s_at  |
| TAB2      | 23118  | Clynes-121    | 0,205  | 2,413E-02 | Positive | 212184_s_at  |
| TAB2      | 23118  | Minn-96       | 0,344  | 6,096E-04 | Positive | 210284_s_at  |
| TAB2      | 23118  | Wang-286      | 0,145  | 1,415E-02 | Positive | 212184_s_at  |
| TIRAP     | 114609 | Bos-204       | -0,149 | 3,391E-02 | Negative | 1554091_a_at |
| TIRAP     | 114609 | Smid-210      | -0,142 | 3,913E-02 | Negative | 1554091_a_at |
| TLR4      | 7099   | Bertucci-266  | 0,209  | 6,175E-04 | Positive | 224341_x_at  |
| TLR4      | 7099   | Black-107     | 0,256  | 7,810E-03 | Positive | 224341_x_at  |
| TLR4      | 7099   | Booser-508    | 0,266  | 1,045E-09 | Positive | 221060_s_at  |
| TLR4      | 7099   | Clynes-121    | 0,363  | 4,167E-05 | Positive | 224341_x_at  |
| TLR4      | 7099   | Iglehart-123  | 0,222  | 1,354E-02 | Positive | 221060_s_at  |
| TLR4      | 7099   | Jonsdottir-94 | 0,220  | 3,296E-02 | Positive | ILMN_1706217 |
| TLR4      | 7099   | Minn-96       | 0,227  | 2,613E-02 | Positive | 221060_s_at  |
| TLR4      | 7099   | Sotiriou-120  | 0,299  | 9,182E-04 | Positive | 224341_x_at  |
| TNF       | 7124   | Bertucci-266  | 0,241  | 7,314E-05 | Positive | 207113_s_at  |
| TNF       | 7124   | Booser-508    | 0,244  | 2,670E-08 | Positive | 207113_s_at  |
| TNF       | 7124   | Bos-204       | 0,162  | 2,063E-02 | Positive | 207113_s_at  |
| TNF       | 7124   | Jonsdottir-94 | 0,263  | 1,057E-02 | Positive | ILMN_1728106 |
| TNF       | 7124   | Smid-210      | 0,152  | 2,740E-02 | Positive | 207113_s_at  |
| TNF       | 7124   | Sotiriou-120  | 0,261  | 4,025E-03 | Positive | 207113_s_at  |
| TNFAIP3   | 7128   | Bertucci-266  | 0,405  | 6,297E-12 | Positive | 202644_s_at  |
| TNFAIP3   | 7128   | Black-107     | 0,219  | 2,352E-02 | Positive | 202644_s_at  |

| Gene name | GeneID | Dataset       | R     | P         | Sign     | Probe        |
|-----------|--------|---------------|-------|-----------|----------|--------------|
| TNFAIP3   | 7128   | Booser-508    | 0,214 | 1,134E-06 | Positive | 202644_s_at  |
| TNFAIP3   | 7128   | Bos-204       | 0,247 | 3,638E-04 | Positive | 202644_s_at  |
| TNFAIP3   | 7128   | Chin-124      | 0,305 | 5,821E-04 | Positive | 202644_s_at  |
| TNFAIP3   | 7128   | Clynes-121    | 0,329 | 2,306E-04 | Positive | 202644_s_at  |
| TNFAIP3   | 7128   | EXPO-351      | 0,157 | 3,274E-03 | Positive | 202644_s_at  |
| TNFAIP3   | 7128   | Iglehart-123  | 0,269 | 2,583E-03 | Positive | 202644_s_at  |
| TNFAIP3   | 7128   | Jonsdottir-94 | 0,212 | 4,008E-02 | Positive | ILMN_1702691 |
| TNFAIP3   | 7128   | Minn-96       | 0,281 | 5,520E-03 | Positive | 202644_s_at  |
| TNFAIP3   | 7128   | Smid-210      | 0,252 | 2,286E-04 | Positive | 202644_s_at  |
| TNFAIP3   | 7128   | Wang-286      | 0,301 | 2,172E-07 | Positive | 202644_s_at  |
| TNFRSF11A | 8792   | Bertucci-266  | 0,198 | 1,152E-03 | Positive | 238846_at    |
| TNFRSF11A | 8792   | Booser-508    | 0,143 | 1,259E-03 | Positive | 207037_at    |
| TNFRSF11A | 8792   | Bos-204       | 0,167 | 1,703E-02 | Positive | 238846_at    |
| TNFRSF11A | 8792   | Chin-124      | 0,279 | 1,721E-03 | Positive | 207037_at    |
| TNFRSF11A | 8792   | EXPO-351      | 0,256 | 1,225E-06 | Positive | 238846_at    |
| TNFRSF11A | 8792   | Wang-286      | 0,168 | 4,371E-03 | Positive | 207037_at    |
| TNFRSF13C | 115650 | Clynes-121    | 0,236 | 9,016E-03 | Positive | 1552892_at   |
| TNFRSF13C | 115650 | Jonsdottir-94 | 0,219 | 3,367E-02 | Positive | ILMN_1731742 |
| TNFRSF13C | 115650 | Servant-343   | 0,109 | 4,326E-02 | Positive | ILMN_1731742 |
| TNFRSF1A  | 7132   | Bertucci-266  | 0,210 | 5,788E-04 | Positive | 207643_s_at  |
| TNFRSF1A  | 7132   | Black-107     | 0,331 | 5,065E-04 | Positive | 207643_s_at  |
| TNFRSF1A  | 7132   | Bos-204       | 0,237 | 6,534E-04 | Positive | 207643_s_at  |
| TNFRSF1A  | 7132   | EXPO-351      | 0,210 | 7,105E-05 | Positive | 207643_s_at  |
| TNFRSF1A  | 7132   | Jonsdottir-94 | 0,251 | 1,479E-02 | Positive | ILMN_1685005 |
| TNFRSF1A  | 7132   | Minn-96       | 0,259 | 1,091E-02 | Positive | 207643_s_at  |
| TNFRSF1A  | 7132   | Smid-210      | 0,214 | 1,808E-03 | Positive | 207643_s_at  |
| TNFRSF1A  | 7132   | Sotiriou-198  | 0,253 | 3,277E-04 | Positive | 207643_s_at  |
| TNFRSF1A  | 7132   | Wang-286      | 0,238 | 4,924E-05 | Positive | 207643_s_at  |
| TNFSF11   | 8600   | Bertucci-266  | 0,139 | 2,343E-02 | Positive | 211153_s_at  |
| TNFSF11   | 8600   | Booser-508    | 0,180 | 4,635E-05 | Positive | 211153_s_at  |
| TNFSF11   | 8600   | Clynes-121    | 0,233 | 1,019E-02 | Positive | 210643_at    |
| TNFSF11   | 8600   | EXPO-351      | 0,136 | 1,061E-02 | Positive | 210643_at    |
| TNFSF11   | 8600   | Jonsdottir-94 | 0,294 | 4,060E-03 | Positive | ILMN_1673175 |
| TNFSF11   | 8600   | Servant-343   | 0,156 | 3,816E-03 | Positive | ILMN_1673175 |
| TNFSF11   | 8600   | Sotiriou-120  | 0,342 | 1,336E-04 | Positive | 210643_at    |
| TNFSF11   | 8600   | Sotiriou-198  | 0,163 | 2,180E-02 | Positive | 210643_at    |
| TNFSF13B  | 10673  | Bertucci-266  | 0,273 | 6,454E-06 | Positive | 223502_s_at  |
| TNFSF13B  | 10673  | Black-107     | 0,242 | 1,218E-02 | Positive | 223502_s_at  |
| TNFSF13B  | 10673  | Bos-204       | 0,258 | 1,999E-04 | Positive | 223502_s_at  |
| TNFSF13B  | 10673  | Clynes-121    | 0,302 | 7,655E-04 | Positive | 223502_s_at  |
| TNFSF13B  | 10673  | EXPO-351      | 0,161 | 2,508E-03 | Positive | 223502_s_at  |
| TNFSF13B  | 10673  | Iglehart-123  | 0,270 | 2,552E-03 | Positive | 223502_s_at  |
| TNFSF13B  | 10673  | Smid-210      | 0,276 | 4,936E-05 | Positive | 223502_s_at  |
| TNFSF13B  | 10673  | Sotiriou-120  | 0,201 | 2,735E-02 | Positive | 223502_s_at  |
| TNFSF14   | 8740   | Bertucci-266  | 0,297 | 8,297E-07 | Positive | 207907_at    |
| TNFSF14   | 8740   | Black-107     | 0,197 | 4,149E-02 | Positive | 233935_at    |
| TNFSF14   | 8740   | Booser-508    | 0,181 | 4,234E-05 | Positive | 207907_at    |
| TNFSF14   | 8740   | Bos-204       | 0,162 | 2,026E-02 | Positive | 207907_at    |
| TNFSF14   | 8740   | Chin-124      | 0,254 | 4,485E-03 | Positive | 207907_at    |
| TNFSF14   | 8740   | Servant-343   | 0,111 | 4,040E-02 | Positive | ILMN_2363392 |
| TNFSF14   | 8740   | Sotiriou-120  | 0,269 | 2,987E-03 | Positive | 207907_at    |
| TRADD     | 8717   | Bertucci-266  | 0,189 | 2,009E-03 | Positive | 1729_at      |
| TRADD     | 8717   | Black-107     | 0,232 | 1,598E-02 | Positive | 1729_at      |
| TRADD     | 8717   | Wang-286      | 0,197 | 7,945E-04 | Positive | 205641_s_at  |
| TRAF1     | 7185   | Bertucci-266  | 0,236 | 1,036E-04 | Positive | 205599_at    |
| TRAF1     | 7185   | Black-107     | 0,191 | 4,833E-02 | Positive | 205599_at    |
| TRAF1     | 7185   | Booser-508    | 0,276 | 2,377E-10 | Positive | 205599_at    |
| TRAF1     | 7185   | Bos-204       | 0,162 | 2,043E-02 | Positive | 205599_at    |

| Gene name | GeneID | Dataset       | R      | P         | Sign     | Probe        |
|-----------|--------|---------------|--------|-----------|----------|--------------|
| TRAF1     | 7185   | Chin-124      | 0,251  | 4,950E-03 | Positive | 205599_at    |
| TRAF1     | 7185   | Clynes-121    | 0,253  | 5,055E-03 | Positive | 205599_at    |
| TRAF1     | 7185   | Iglehart-123  | 0,297  | 8,427E-04 | Positive | 205599_at    |
| TRAF1     | 7185   | Jonsdottir-94 | 0,398  | 7,245E-05 | Positive | ILMN_1698218 |
| TRAF1     | 7185   | Smid-210      | 0,156  | 2,406E-02 | Positive | 205599_at    |
| TRAF1     | 7185   | Wang-286      | 0,167  | 4,733E-03 | Positive | 205599_at    |
| TRAF2     | 7186   | Booser-508    | -0,118 | 7,533E-03 | Negative | 204413_at    |
| TRAF2     | 7186   | EXPO-351      | -0,113 | 3,361E-02 | Negative | 204413_at    |
| TRAF2     | 7186   | Servant-343   | -0,163 | 2,416E-03 | Negative | ILMN_1691487 |
| TRAF3     | 7187   | Bertucci-266  | 0,233  | 1,225E-04 | Positive | 221571_at    |
| TRAF3     | 7187   | Bos-204       | 0,190  | 6,407E-03 | Positive | 221571_at    |
| TRAF3     | 7187   | Clynes-121    | 0,229  | 1,155E-02 | Positive | 221571_at    |
| TRAF3     | 7187   | Jonsdottir-94 | 0,209  | 4,352E-02 | Positive | ILMN_2383774 |
| TRAF3     | 7187   | Smid-210      | 0,187  | 6,659E-03 | Positive | 221571_at    |
| TRAF3     | 7187   | Sotiriou-120  | 0,185  | 4,255E-02 | Positive | 221571_at    |
| TRAF5     | 7188   | Bertucci-266  | -0,130 | 3,471E-02 | Negative | 204352_at    |
| TRAF5     | 7188   | Booser-508    | -0,109 | 1,405E-02 | Negative | 204352_at    |
| TRAF5     | 7188   | EXPO-351      | -0,107 | 4,539E-02 | Negative | 204352_at    |
| TRAF5     | 7188   | Minn-96       | -0,216 | 3,492E-02 | Negative | 204352_at    |
| TRAF5     | 7188   | Smid-210      | -0,162 | 1,913E-02 | Negative | 204352_at    |
| TRAF5     | 7188   | Sotiriou-120  | 0,225  | 1,363E-02 | Positive | 204352_at    |
| TRAF6     | 7189   | Bertucci-266  | 0,173  | 4,555E-03 | Positive | 205558_at    |
| TRAF6     | 7189   | Booser-508    | 0,111  | 1,268E-02 | Positive | 205558_at    |
| TRAF6     | 7189   | Jonsdottir-94 | 0,262  | 1,073E-02 | Positive | ILMN_2392143 |
| TRIM25    | 7706   | Minn-96       | 0,225  | 2,719E-02 | Positive | 206911_at    |
| UBE2I     | 7329   | Booser-508    | -0,276 | 2,300E-10 | Negative | 213535_s_at  |
| UBE2I     | 7329   | Minn-96       | -0,290 | 4,179E-03 | Negative | 213535_s_at  |
| UBE2I     | 7329   | Sotiriou-198  | -0,147 | 3,877E-02 | Negative | 213535_s_at  |
| UBE2I     | 7329   | Wang-286      | -0,119 | 4,518E-02 | Negative | 213535_s_at  |
| VCAM1     | 7412   | Bertucci-266  | 0,314  | 1,777E-07 | Positive | 203868_s_at  |
| VCAM1     | 7412   | Black-107     | 0,215  | 2,645E-02 | Positive | 203868_s_at  |
| VCAM1     | 7412   | Booser-508    | 0,205  | 3,104E-06 | Positive | 203868_s_at  |
| VCAM1     | 7412   | Bos-204       | 0,208  | 2,894E-03 | Positive | 203868_s_at  |
| VCAM1     | 7412   | Chin-124      | 0,318  | 3,229E-04 | Positive | 203868_s_at  |
| VCAM1     | 7412   | Clynes-121    | 0,419  | 1,681E-06 | Positive | 203868_s_at  |
| VCAM1     | 7412   | EXPO-351      | 0,165  | 1,971E-03 | Positive | 203868_s_at  |
| VCAM1     | 7412   | Iglehart-123  | 0,325  | 2,446E-04 | Positive | 203868_s_at  |
| VCAM1     | 7412   | Jonsdottir-94 | 0,284  | 5,596E-03 | Positive | ILMN_2307903 |
| VCAM1     | 7412   | Minn-96       | 0,204  | 4,637E-02 | Positive | 203868_s_at  |
| VCAM1     | 7412   | Smid-210      | 0,198  | 3,934E-03 | Positive | 203868_s_at  |
| VCAM1     | 7412   | Sotiriou-198  | 0,215  | 2,407E-03 | Positive | 203868_s_at  |
| VCAM1     | 7412   | Wang-286      | 0,308  | 1,113E-07 | Positive | 203868_s_at  |
| XIAP      | 331    | Booser-508    | 0,173  | 9,246E-05 | Positive | 206536_s_at  |
| XIAP      | 331    | Servant-343   | 0,109  | 4,376E-02 | Positive | ILMN_1815361 |
| XIAP      | 331    | Wang-286      | -0,178 | 2,508E-03 | Negative | 206536_s_at  |
| ZAP70     | 7535   | Bertucci-266  | 0,252  | 3,242E-05 | Positive | 214032_at    |
| ZAP70     | 7535   | Booser-508    | 0,157  | 3,898E-04 | Positive | 214032_at    |
| ZAP70     | 7535   | Bos-204       | 0,151  | 3,093E-02 | Positive | 1555613_a_at |
| ZAP70     | 7535   | Chin-124      | 0,289  | 1,128E-03 | Positive | 214032_at    |
| ZAP70     | 7535   | Iglehart-123  | 0,213  | 1,826E-02 | Positive | 1555613_a_at |
| ZAP70     | 7535   | Jonsdottir-94 | 0,254  | 1,360E-02 | Positive | ILMN_1719756 |
| ZAP70     | 7535   | Smid-210      | 0,164  | 1,739E-02 | Positive | 1555613_a_at |
| ZAP70     | 7535   | Wang-286      | 0,169  | 4,245E-03 | Positive | 214032_at    |

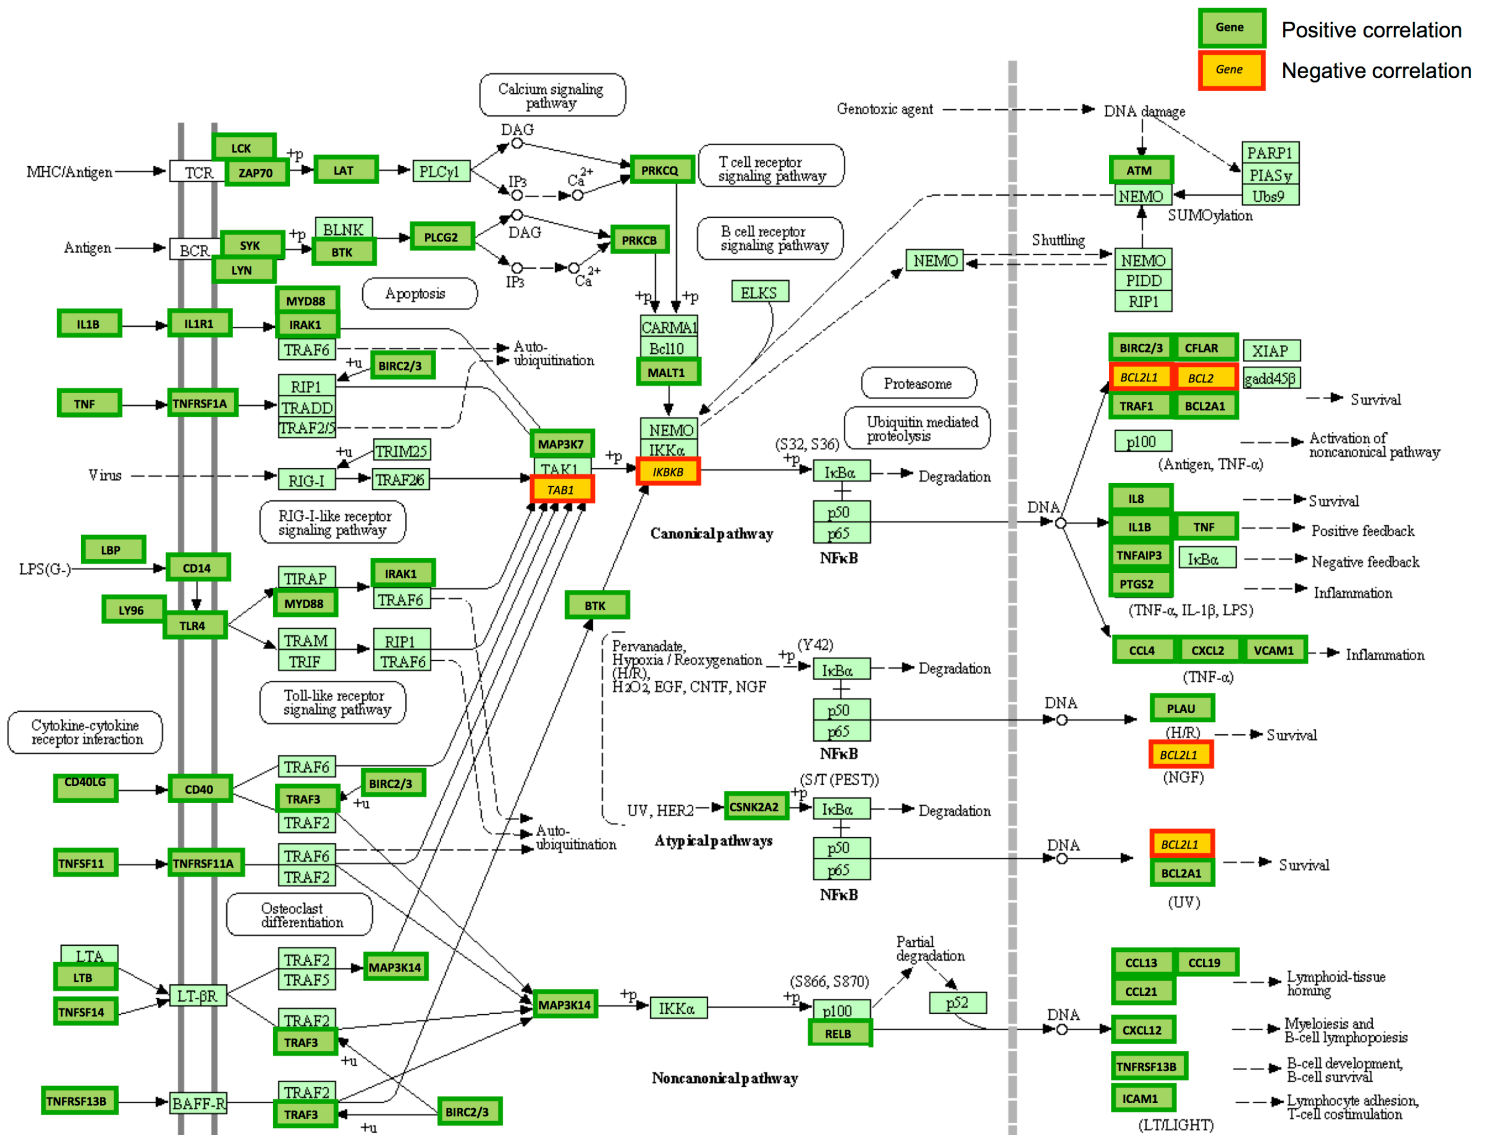

| Primer | Sequence                                             |
|--------|------------------------------------------------------|
| 1      | GGGGACAACCTTTGTACAAAAAAGTTGGCATGAACTCCTTTCTGG        |
| 2      | GGGGACAACCTTTGTACAAAAAAGTTGGCATGTGCGGCGGCGACGACCGC   |
| 3      | GCGGCAGCTGCCAAGGAGGGGCTCCTG                          |
| 4      | GCGGCAGCTGCCACCTTTGACTGGATG                          |
| 5      | GGGGACAACCTTTGTACAAGAAAGTTGGGTAGTGGGAGGTAGTCAGAGTGTC |
| 6      | GGCAGCTGCCGCTTGACCCACGTAGCC                          |
| 7      | GGCAGCTGCCGCGTGGTGATGGTG                             |
| 8      | GGCAGCTGCCGCGGGCGAGCTGATCTGCACCCC                    |
| 9      | GCGGCAGCTGCCCCCCAGACGGCTACTTACCAG                    |
| 10     | TTAACTGCAGTCACTCACGCTTCTTCTG                         |

| HOXA1 mutants            | First PCR |          | Second PCR |          |
|--------------------------|-----------|----------|------------|----------|
|                          | Primer F  | Primer R | Primer F   | Primer R |
| HOXA1 <sup>ΔNter</sup>   | 2         | 5        | x          | x        |
| HOXA1 <sup>ΔCenter</sup> | 1         | 7        | 4          | 5        |
| HOXA1 <sup>Δ11His</sup>  | 1         | 8        | 9          | 5        |
| HOXA1 <sup>ΔHD</sup>     | 1         | 6        | 3          | 5        |
| HOXA1 <sup>ΔCter</sup>   | 1         | 10       | x          | x        |

# Supplemental Figure 2

Taminiau *et al.*

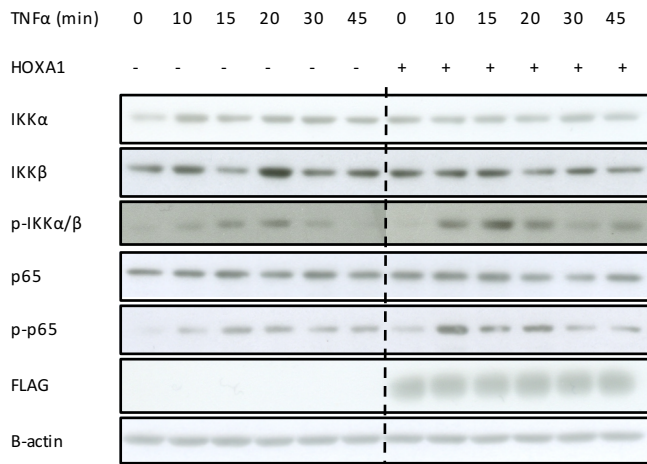

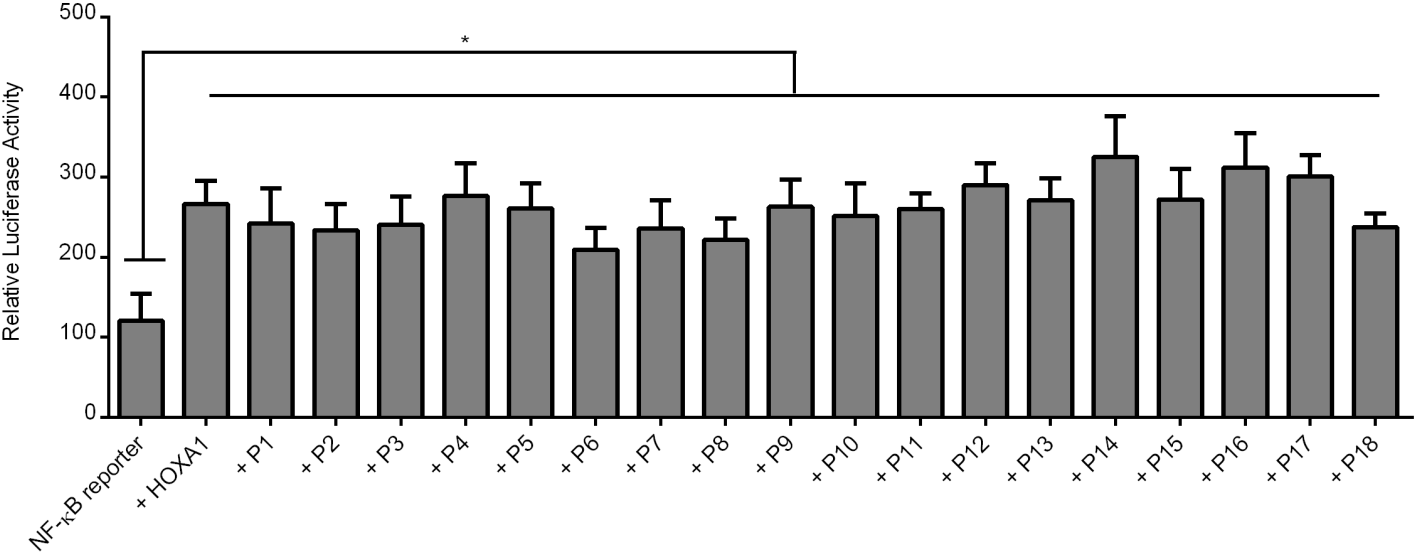

Supplement: supp_gkw606_new_Supplemental_Data_Taminiau_et_al.pdf [file supp_gkw606_new_Supplemental_Data_Taminiau_et_al.pdf]
